1 **Body mass aging trajectory is modulated by environmental conditions but independent of**  
2 **lifespan**

3

4 Michael Briga<sup>1,3</sup>, Blanca Jimeno<sup>1,2</sup> and Simon Verhulst<sup>1</sup>

5

6 <sup>1</sup>Groningen Institute for Evolutionary Life Sciences, University of Groningen, Groningen, the  
7 Netherlands.

8 <sup>2</sup> Max Planck Institute for Ornithology, Seewiesen, Germany.

9 <sup>3</sup> Present address: Department of Biology, University of Turku, Turku, Finland.

10

11 **Abstract**

12 How lifespan associates with aging trajectories of health and disease is an urgent question in  
13 societies with increasing lifespan. Body mass declines with age are associated with decreased  
14 organismal functioning in many species. We tested whether two factors that decreased lifespan  
15 in zebra finches, sex and manipulated environmental quality, accelerated the onset and/or rate  
16 of within-individual body mass declines. We subjected 597 birds for nine years to  
17 experimentally manipulated foraging costs (harsh = H, benign = B) during development and in  
18 adulthood in a 2x2 design. This yielded four treatment combinations (HH, HB, BH, BB). Harsh  
19 environments during development and in adulthood decreased average body mass additively. In  
20 males, the aging trajectory was quadratic, with a maximum between 3.5 and 4 years, and  
21 independent of the environment (HH=HB=BH=BB). In females, the shape of the aging trajectory  
22 differed between environments: a quadratic trajectory as in males in the benign adult  
23 environment (HB=BB), a linear decline when benign development was followed by harsh  
24 adulthood (BH) and a linear increase when in a lifelong harsh environment (HH). We found no  
25 evidence for an association between lifespan and body mass aging trajectories either between or  
26 within experimental groups. However, females lived shorter than males, and their body mass  
27 decline started earlier for most treatment combinations. Thus, we conclude that foraging  
28 conditions can affect the shape of body mass aging trajectories, but these are independent of  
29 lifespan.

## 30 **Introduction**

31 Senescence is the decline in organismal functioning with age resulting in declining fecundity and  
32 survival. Aging is a change in trait functioning with age, which may or may not be associated  
33 with declines in fecundity or survival. Aging ends in death and therefore the (implicit)  
34 assumption is often made that factors that changes in lifespan also alter aging. However, aging  
35 can differ from lifespan in that it explicitly refers to the *change* in organismal functioning  
36 preceding death. Hence to what extent factors that alter lifespan also alter aging remains to be  
37 identified (Bansal et al., 2015; Christensen et al., 2009; Hansen and Kennedy, 2016; Williams,  
38 1999). This issue is of major relevance to contemporary society. Life expectancy has increased  
39 continuously since the 19<sup>th</sup> century, but to what extent this increase is accompanied by delays in  
40 aging remains unclear (Christensen et al., 2009). Hence, to what extent aging and lifespan are  
41 scaled and affected by the same factors remains an issue in our ever longer-living society.

42 A key point underlying the association between aging and lifespan is identifying how organisms  
43 and traits change with age. Aging can occur following a variety of trajectories, which can be  
44 characterized by an age of onset, a rate and a shape. It is known that environmental quality  
45 during development and/or adulthood can alter the onset and rate of aging (Bouwhuis et al.,  
46 2010; Lemaitre and Gaillard, 2017; Nussey et al., 2013, 2007). In contrast, what determines the  
47 shape of the aging trajectory remains poorly known. Aging shapes can vary widely (Fig. 1). For  
48 example, aging may start at a certain age and decline linearly (Fig. 1A) or accelerating till death  
49 (Fig. 1B). This accelerating scenario was described for body mass in humans (Kuk et al., 2009)  
50 and laboratory rodents (Miller et al., 2002; Murtagh-Mark et al., 1995; Yu et al., 1985).  
51 Alternatively, aging may occur sharply before death, a phenomenon coined terminal decline (Fig.  
52 1C). This scenario was described for a variety of traits in birds, including social dominance,  
53 sexual signals, telomere length and reproduction (Coulson and Fairweather, 2001; Rattiste,  
54 2004; Salomons et al., 2009; Simons et al., 2016; Torres et al., 2011; Verhulst et al., 2014). The  
55 shape of aging trajectories are often described as trait-specific (Gaillard and Lemaitre, 2017;  
56 Hayward et al., 2015). Unfortunately, individual variation in aging shapes has rarely been  
57 investigated. Hence, what determines aging shapes and to what extent they are individual-  
58 specific remains poorly known.

59 Here, we test whether factors that affect lifespan concomitantly alter body mass aging in zebra  
60 finches. Body mass predicts survival or lifespan in a variety species, including in rodents, zebra  
61 finches and humans (Briga, 2016; Miller et al., 2002; Prospective Studies Collaboration, 2009).  
62 Its aging is widely observed (Douhard et al., 2017) and its decline is associated with behavioral  
63 and physical deterioration including foraging efficiency (Catry et al., 2006), loss of muscle mass  
64 (sarcopenia) and muscle strength (Colman et al., 2008; Sayer et al., 2008) and loss of body fat

65 (Kuk et al., 2009). Hence body mass is a key trait associated with organismal functioning and  
66 survival in many species.

67 We here use an outdoor-living captive population of zebra finches exposed to natural weather  
68 fluctuations and monitored from birth till natural death (Briga et al., 2017; Briga and Verhulst,  
69 2015a). These birds showed two levels of variation in lifespan. The first level is induced by an  
70 experimental manipulation of environmental quality. The environment can affect lifespan at all  
71 ages, but the development phase is thought of as a particularly important for adult lifespan and  
72 health (Lindström, 1999; Lummaa and Clutton-Brock, 2002; Metcalfe and Monaghan, 2001). In  
73 our study, we altered developmental conditions by cross fostering chicks to either small or large  
74 broods. Growing up in large broods impairs growth and hence, large broods represent a harsh  
75 environment (Briga et al., 2017; Griffith and Buchanan, 2010). However, the long-term effects of  
76 developmental conditions on lifespan can depend on the environmental conditions in adulthood  
77 (Bateson et al., 2004; Hanson and Gluckman, 2014) . We thus experimentally manipulated  
78 foraging costs during adulthood and exposed birds from both developmental conditions to  
79 either low or high foraging costs in a 2x2 design. We further abbreviate the high foraging cost  
80 group as harsh (H) and the low foraging cost group as benign (B). Hence, we have four treatment  
81 combinations (BB, HB, BH, HH). The group that experienced a harsh environment during  
82 development and in adulthood (HH group) lived 6 months (12%) shorter compared to all other  
83 treatment combinations. Furthermore, females lived one month shorter than males (Briga et al.,  
84 2017). Thus, if aging trajectories are scaled to lifespan, we expect an accelerated onset and/or  
85 rate of body mass decline in females relative to males, and in the HH group relative to all other  
86 treatment combinations.

## 87 **Material & methods**

### 88 Experimental setup

89 The birds were reared in either experimentally small broods (with 2 or 3 chicks, modal =2) and  
90 large broods (between 5 and 8 chicks, modal=6). These brood sizes are within the range  
91 observed in wild (Zann, 1996). Growing up in large broods impairs growth (Briga, 2016; Briga et  
92 al., 2017). After nutritional independence and before the start of the foraging cost manipulation,  
93 i.e. between 35 days till approximately 120 days, young were housed in larger indoor cages with  
94 up to 40 other young of the same sex and two male and two female adults. Once adult, birds  
95 were subject to a long-term foraging experiment, (Koetsier and Verhulst, 2011). Briefly, birds  
96 were housed in eight single sex outdoor aviaries (LxHxW 310x210x150 cm) located in  
97 Groningen, the Netherlands (53° 13' 0" N / 6° 33' 0" E). Food (tropical seed mixture) water, grit  
98 and cuttlebone were provided *ad libitum*. In addition, the birds received fortified canary food  
99 ("egg food", by Bogena, Hedel, the Netherlands) in weighed portions. Each aviary contained an  
100 approximately equal number of birds and to keep densities within aviaries within a limited  
101 range, new birds were added regularly to replace those that died. The first batch was 3-24  
102 months old when the experiment started and birds added later were 3 to 4 months old.

### 103 Lifespan estimates

104 Group-specific estimates of median lifespan were taken from (Briga et al., 2017). In brief, there  
105 we estimated lifespan using two approaches, Cox proportional hazards (Cox, 1972) and  
106 Gompertz fits (Gompertz, 1825). Both approaches showed that (i) the median lifespan of the HH  
107 group was 6 months (12%) shorter relative to all other treatment combinations and (ii) females  
108 lived one month shorter than males. The environmental effect on lifespan was more pronounced  
109 in females than males (table 1) but this difference was not significant (Briga et al., 2017).

### 110 Data collection

111 Between December 2007 and December 2015, we collected 15443 mass measurements on 597  
112 individuals, with birds being measured between 1 and 95 times over their lifetime (Fig. S1A).  
113 Data were collected from individuals covering an age range from 0.4 months till 9.4 years (Fig.  
114 S1B) and at almost monthly intervals (Fig. S2B). Measurements were randomized across  
115 experimental groups. At the average age of 120 days (SD: 29 days), we measured body size,  
116 using the average of the tarsus and the headbill after transforming both to a standard normal  
117 distribution.

### 118 Statistical analyses

119 Data for all traits were collected at any hour of the day and throughout the year (Fig. S2A & B).  
120 To avoid confounding age patterns with daily or seasonal effects, we corrected for daily and

121 seasonal variation in trait values. To this end, we first investigated for each trait how best to  
122 correct for daily and seasonal variation in trait values (Supp. Information 2). Model selection  
123 approach (see below) indicated that we best captured daily and seasonal variation in 3  
124 variables: (i) daylength, (ii) photoperiod dynamics (increase vs. decrease), (iii) time of  
125 measurement and their interactions (Table S1). Hence to obtain unbiased age estimates we use  
126 body mass values adjusted for daily and seasonal fluctuations in all further analyses.

127 Population level associations between trait values and age can be composed of two processes: (i)  
128 a within individual change in trait value with age and (ii) a between individual change due to  
129 selective mortality of individuals with certain trait values. We distinguished the contributions of  
130 these two processes using a within subjects centering approach (van de Pol and Verhulst, 2006;  
131 van de Pol and Wright, 2009). In this approach the within individual changes are captured in a  
132  $\Delta$ age term, which is the age at measurement mean centered per individual. Within individual  
133 changes can also show terminal changes before death. We therefore added a terminal term as a  
134 separate variable, coded as a binomial factor for whether or not an individual died within the  
135 year following the measurement. The between individual change is captured by the term  
136 lifespan, mean centered across our population. For censored birds, i.e. those still alive (N=179)  
137 or that died an accidental death (N=16), lifespan is unknown and thus received a lifespan of zero.  
138 In this way, these birds contribute only to the estimate of within individual trait change while  
139 having no effect on the estimates of between individual trait change. To test whether within  
140 individual change is environment specific we included the interaction between  $\Delta$ age terms and  
141 our experimental manipulations. Tests for context dependent developmental effects were done  
142 with three-way interactions (e.g.  $\Delta$ age\*development\*adult).

143 All analyses were done using a general linear mixed modeling approach with the function 'lmer'  
144 of the package 'lme4' version 1.1-10 (Bates et al., 2015) in R version 3.2.1 (R Core Team, 2014).  
145 Experimental treatments during development (small vs. large broods), adulthood (low vs. high  
146 foraging costs) and their interaction were included as categorical variables. All analyses included  
147 individual as a random intercept and  $\Delta$ age and  $\Delta$ age<sup>2</sup> nested within individuals as a random  
148 'slope'. The random slope quantifies the within-individual variation in aging and is required for  
149 the correct estimation of confidence intervals when investigating within individual changes  
150 (Schielzeth and Forstmeier, 2009). Such models require considerable sample sizes to accurately  
151 estimate fixed and random effects and our data (Fig. S1A & B) fulfilled those requirements (van  
152 de Pol, 2012). Residuals of all final models were normally distributed and without outliers (Figs.  
153 S4). Confidence intervals of model parameters were estimated with the Wald approximation in  
154 the function 'confint'. In selected cases we report effect sizes, estimated as the ratio of the

155 coefficient to the variable's standard deviation, following equation 1 in (Nakagawa and Cuthill,  
156 2007).

157 To find the model best supported by the data we used the model selection approach proposed by  
158 Burnham and Anderson (Burnham and Anderson, 2002; Burnham et al., 2011) based on second  
159 order Akaike Information Criterion (AICc) with the function 'dredge' of the package 'MuMIn'  
160 version 1.15.1 (Barton, 2009). In brief, this is a hypothesis-based approach that generates, given  
161 a global model, subset models that best fit the data. Better fitting models are indicated by their  
162 lower AICc and, as a rule of thumb, a decrease of 2 AICc is considered significant (Burnham and  
163 Anderson, 2002; Burnham et al., 2011).

## 164 **Results**

165 We collected 15,443 measurements on 597 birds covering an age range from 0.4 months till 9.4  
166 years (Figs. S1A & B). On average, birds reared in large broods weighed 0.56g (95%CI: -0.77, -  
167 0.35) less than birds reared in small broods (Table S2;  $\Delta\text{AICc}=-22.4$ ), and birds in the harsh adult  
168 environment weighed 0.66g (95%CI: -0.87, -0.45) less than birds in the benign adult  
169 environment (Table S2;  $\Delta\text{AICc}=-32.4$ ). The effects of both manipulations on mass were additive  
170 (Table S2; developmental \* adult environment  $\Delta\text{AICc}=+3.3$ ; Fig 2). Because mass is to a large  
171 extent determined by an individual's body size ( $r=0.56$ ), we investigated to what extent the  
172 manipulation effects on mass were independent of size. Growing up in large broods resulted in  
173 smaller adult body size ( $N=594$  individuals;  $t=-4.37$ ;  $p=0.00001$ ), while there was no association  
174 between the adult manipulation and size ( $t=-1.41$ ;  $p=0.16$ ). When we analyzed the manipulation  
175 effects on mass including body size as a covariate, we found that the effect of the brood size  
176 manipulation on mass approximately halved from 0.56 to 0.27g, but the effect of brood size on  
177 mass remained clear ( $\Delta\text{AICc}=-1.7$ ). In contrast, correcting for size made the adult manipulation  
178 effect on mass more evident ( $\Delta\text{AICc}=-40.8$ ; Fig. S3; see SI 3 for details). Thus, both manipulations  
179 affected mass, but the effect of the developmental manipulation was partially mediated via body  
180 size, while, as expected, the effect of the adult manipulation was size independent.

## 181 **Aging trajectories and lifespan between groups**

182 We investigated the body mass aging trajectory within individuals in the different  
183 environmental treatment categories, testing for the scenarios in Fig. 1. In the complete dataset,  
184 the aging trajectory was best described by a quadratic shape, rather than a linear shape  
185 ( $\Delta\text{AICc}=+375.5$ ). A quadratic shape also fitted the data better than a terminal effect either on its  
186 own ( $\Delta\text{AICc}=+354.5$ ) or in combination with a quadratic or linear decline ( $+5.3<\Delta\text{AICc}<+341.9$ ).  
187 However, sexes differed in their age trajectory ( $\Delta\text{age}^2 * \text{sex } \Delta\text{AICc}=-46.2$ ) and in their  
188 environmental susceptibility of the age trajectory ( $\Delta\text{age}^2 * \text{foraging treatment} * \text{sex } \Delta\text{AICc}=-$   
189 37.9). Moreover, females were slightly heavier than males (not corrected for their size;  $\Delta\text{AICc}=-$   
190 50.7; Table S3). To gain better insight in these interactions, we further analyzed the sexes  
191 separately.

192 In males, the best fitting aging trajectory was quadratic ( $\Delta\text{AICc}<-163.0$ ; Table S4) independent of  
193 the environmental manipulations ( $\Delta\text{AICc}>+7.1$ ; Fig. 3C-F; Table S4). The quadratic random term  
194 varied little between individuals relative to individual as random intercept (variance explained:  
195 1.8% vs. 81%), showing that individuals differed more in their mean mass than in their aging  
196 trajectory. A quadratic age term can reflect a trajectory that first increases and then decreases  
197 (or vice versa), but can also reflect e.g. a levelling off with increasing age. To discriminate  
198 between these patterns, we tested whether mass changed significantly with age pre- and post-



199 peak. For all treatment combinations pooled, maximum body mass was reached at the age of 4.2  
200 years. In the pre-peak phase, mass increased significantly with age (0.07 g/yr; 95%CI: 0.04, 0.11;  
201  $\Delta\text{AICc}=-8.0$ ), and mass decreased post-peak, albeit not significantly (-0.03 g/yr; 95%CI: -0.17,  
202 0.09;  $\Delta\text{AICc}=+5.3$ ). Thus, for all treatment combinations pooled, male body mass aging  
203 trajectories was quadratic, increasing till the age of 4.2 years followed by a non-significant  
204 decline.

205 To compare the scaling of the onset of body mass decline with the median lifespan of all  
206 treatment combinations, we analysed the aging trajectories of all treatment combinations in  
207 separate models. This more sensitive approach confirmed a quadratic aging trajectory for all  
208 treatment combinations (Fig. 3). However, for the BB group, male body mass peaked late at the  
209 age of 8.2 years (Fig. 3A). In the other treatment combinations body mass peaked earlier, at 3.7,  
210 3.4 and 3.9 years for HB, BH and HH respectively (Fig. 3B-D). Given a median lifespan per group  
211 of 4.3, 4.0, 3.6 and 3.6 years for BB, HB, BH and HH respectively (Table 1), this shows that aging  
212 and lifespan are not scaled. Thus, analyzing all treatment combinations separately confirmed a  
213 quadratic aging trajectory for male body mass and the onset of the post-peak decline was not  
214 scaled to the group's median lifespan.

215 In females, the aging trajectory differed between the benign and harsh foraging environment  
216 ( $\Delta\text{Age}^2 * \text{treatment } \Delta\text{AICc}=-16.1$ ; Table S5). Analyzing these treatments separately revealed that  
217 females in benign foraging environment had a quadratic trajectory ( $\Delta\text{AICc}=-9.3$ ; Fig. 3A & B),  
218 which was independent of brood size ( $\Delta\text{AICc}>+6.5$ ; Table S6A). The quadratic random 'slope'  
219 varied little between individuals relative to individual as random intercept (variance explained:  
220 1.9% vs. 70%), showing that also female mass differed more between individuals in mean body  
221 mass than in the aging trajectory. Females reached their maximum mass at a younger age than  
222 males, at  $\Delta\text{age} = 0.03$  years or an age of 3.2 years. The pre-peak increase in mass was four times  
223 larger than in males (0.29 g/yr; 95%CI: 0.18, 0.39;  $\Delta\text{AICc}=-17.0$ ). The post-peak decrease was  
224 between two and three times larger than the decrease in males, but not significant (-0.08 g/yr;  
225 95%CI: -0.17, 0.01;  $\Delta\text{AICc}=+3.5$ ). Thus, for females in the easy treatment, mass changed  
226 quadratically with age, characterized by a steep increase with a peak halfway through their life  
227 that is followed by a shallow non-significant decline.

228 For females in the hard treatment the mass age trajectories were linear ( $\Delta\text{AICc}=-8.1$ ; Fig. 3C & D)  
229 and differed between birds from small and large broods ( $\Delta\text{Age} * \text{brood size } \Delta\text{AICc}=-10.9$ ; Table  
230 S6B). For females reared in small broods, mass increased linearly with age, while mass  
231 decreased with age in females from large broods (Fig. 3C & D; Table S6B). Rates of mass change  
232 (in absolute value) was close to 0.1 g/yr for both groups (small broods: 0.10 g/yr; 95%CI: 0.03,  
233 0.17; large broods: -0.14 g/yr; 95%CI: -0.35, -0.13). Thus, for females in the harsh adult

234 environment mass changed linearly with age in a direction that depended on the developmental  
235 conditions.

### 236 **Aging trajectories and lifespan within groups**

237 The approach in the analyses above implicitly estimates an average aging trajectory for all  
238 individuals from a given group. However, there could be an association between lifespan and the  
239 aging trajectory within experimental groups. We tested this using the interaction between  
240 individual lifespan and within individual age terms ( $\Delta\text{age}$ ,  $\Delta\text{age}^2$  and terminal year) and  
241 comparing the fit of the new model relative to the fits of the models above. For males, adding any  
242 of interactions between  $\Delta\text{age}$  or  $\Delta\text{age}^2$  with lifespan to the best fitting model in table S4 resulted  
243 in a poorer model fit ( $\Delta\text{AICc} > +4.8$ , Fig. 4A-D). The same result emerged for females in tables S6-  
244 S7 ( $\Delta\text{AICc} > +6.7$ , Fig. 4E-H). Thus, body mass of individuals with different lifespans within  
245 experimental groups did not show different aging trajectories.

## 246 **Discussion**

247 Identifying how phenotypes change with age (Fig. 1), what affects these changes and how they  
248 scale to lifespan are key questions in an ever longer living society. We here investigated whether  
249 environmental manipulations that shortened lifespan accelerated body mass declines in zebra  
250 finches. We found that male body mass increased with age, followed by a non-significant decline,  
251 and this was independent of experimental treatments during development and in adulthood. In  
252 females, the shape of the aging trajectory was treatment-specific: a quadratic shape as in males  
253 (but significant) in the benign adult environment (BB and HB groups), a linear decline for the BH  
254 group and a linear increase for the HH group. The environmental manipulations that shortened  
255 lifespan altered aging in females but not in males, but the effects on both traits were never  
256 scaled. This is partially because the environment can mold the shape of aging, a rarely studied  
257 phenomenon. However, females lived shorter than males and for most experimental groups,  
258 their body mass decline started earlier. Hence, environment-specific lifespan differences were  
259 not associated with body mass aging, but sex-specific differences were.

## 260 **Scaling of aging and lifespan**

261 To what extent lifespan and aging are scaled remains poorly understood. A previous study using  
262 long-lived *C. elegans* mutants found that for several traits, aging started at the same age for long-  
263 lived mutants as for wild types (Bansal et al., 2015). Hence these long-lived mutants spent a  
264 larger proportion of their lives in an aged state. Whether such result can be extrapolated to more  
265 natural manipulations of lifespan remains an open question (Briga and Verhulst, 2015b). Our  
266 study shows that the longest-living groups spent proportionally more time decreasing body  
267 mass (table 1). Hence our results are consistent with the study of Bansal et al. 2015. It is unclear  
268 whether these results will apply to other traits. Within individuals, different traits age at  
269 different rates and shapes (Gaillard and Lemaitre, 2017; Hayward et al., 2015; Herndon et al.,  
270 2002), including in our zebra finches (Briga, 2016). This complexity can be seen in rapamycin  
271 experiments in rodents which extends lifespan and postpones aging of some traits, including  
272 body mass, but not of others (Fischer et al., 2015; Neff et al., 2013). Hence in our study, the  
273 longest-living groups spent a larger fraction of their lives with lower body mass, but to what  
274 extent this can be extrapolated to other traits and manipulations of lifespan requires further  
275 study.

## 276 **The shape of aging**

277 For several experimental groups we found a quadratic body mass change with age. This shape is  
278 commonly observed in humans (reviewed in Kuk et al., 2009) and in laboratory rodents (Miller  
279 et al., 2002; Murtagh-Mark et al., 1995; Turturro et al., 1999; Yu et al., 1985). It was also

280 observed in wild bighorn sheep *Ovis Canadensis* (Nussey et al., 2011) and in wild yellow-bellied  
281 marmots *Marmota flaviventer* (Kroeger et al., 2018). However, other aging shapes have also  
282 been reported: accelerating declines in Roe deer *Capreolus capreolus* (Nussey et al., 2011),  
283 terminal declines in Soay sheep *Ovis aries* (Hayward et al., 2015), accelerating and terminal  
284 declines in European badgers *Meles meles* (Beirne et al., 2015) and in male Alpine marmots  
285 *Marmota marmota* (Tafani et al., 2013). Note that most of these studies are in mammals.  
286 Previous data in captive zebra finches found that males gained weight with age, while females  
287 did not, but this was based on a small sample with three measurements per individual (Moe et  
288 al., 2009). Hence a variety of body mass aging shapes were described, largely biased towards  
289 mammals, of which a quadratic shape is the most abundant.

290 Population differences in body mass aging, possibly due to differences in environmental quality  
291 were found before, but these focused on the onset or rate of body mass declines (Douhard et al.,  
292 2017; Hämäläinen et al., 2014). Our study expands our view on the flexibility of body mass aging  
293 in previous studies by showing that not only the onset and the rate but also the shape of aging  
294 can be environment-specific. This has rarely been investigated as individual variation in the  
295 shape of aging trajectories is rarely tested for. Such variation can arise for example through  
296 canalization when the association between trait value and fitness is environment-specific  
297 (Boonekamp et al., 2018). The shape of aging is important though because it determines any  
298 comparisons in onset or rate of aging and any associations between aging and other traits such  
299 as lifespan. Thus, to what extent aging trajectories can differ between individuals for other traits  
300 and what determines this flexibility requires further study.

### 301 **Sex-specific aging**

302 For those experimental groups with a quadratic shape, we found that aging started earlier in the  
303 shortest living sex, i.e. females. Theory on sex-specific aging predicts that the shortest living sex  
304 also ages fastest (Bonduriansky et al., 2008; Maklakov and Lummaa, 2013) and hence our result  
305 is consistent with the expectation. Sex-specific body mass aging was found in several wild  
306 mammals and several of these found results consistent with the expectation (Tafani et al., 2013)  
307 (Beirne et al., 2015), but see (Hämäläinen et al., 2014). However, there are many exceptions.  
308 Most notably, in humans women typically outlive males but their age associated body mass  
309 decline starts a decade earlier (reviewed in Kuk et al., 2009).

310 Body mass aging was more sensitive to environmental conditions in females than in males. Sex  
311 biased environmental sensitivity is well known in many species, although its causes in birds  
312 remain unclear (Jones et al., 2009). In zebra finches, some studies found that females were more  
313 sensitive to developmental conditions than males (e.g. de Kogel, 1997; Martins, 2004), although  
314 this is not a general finding (Griffith and Buchanan, 2010). In our study, lifespan showed a trend

315 in that direction, albeit not significantly (Briga et al., 2017). Thus, the female biased  
316 environmental sensitivity of the body mass aging shape is consistent with some trends or results  
317 in this and other zebra finch studies.

### 318 **Manipulation effects on mass**

319 Birds reared in large broods had lower mass in adulthood, in agreement with earlier studies  
320 (reviewed in Griffith and Buchanan, 2010), and this effect was almost entirely due to their  
321 smaller structural size. Increased foraging costs during adulthood also resulted in lower mass,  
322 independent of size or rearing brood size. Size independent mass variation typically reflects  
323 variation in energy reserves, and theory predicts energy reserves to increase with increasing  
324 starvation risk (reviewed in Brodin, 2007). Starvation risk is higher in the high foraging cost  
325 treatment because it increases vulnerability to factors that increase energy needs (e.g.  
326 temperature) or impair foraging (e.g. illness). However, increased energy reserves also incur  
327 energetic costs (Hambly et al., 2004; Kvist et al., 2001; Schmidt-Wellenburg et al., 2008). This  
328 reduces optimal energy reserves, an effect which will also be stronger in the high foraging costs  
329 treatment because birds spend more time flying (Koetsier and Verhulst, 2011). The lower mass  
330 of birds experiencing higher foraging costs suggests that the birds weighed the energetic costs of  
331 carrying extra mass more than the decrease in starvation risk. This result is consistent with the  
332 findings in experiments with captive birds and mammals in which foraging costs were increased  
333 without changing predictability, which consistently resulted in lower mass (reviewed in  
334 Wiersma and Verhulst, 2005).

335 The functional significance of body mass aging trajectories remains poorly understood. Possible  
336 body composition changes underlying the mass age trajectory include loss of body fat and  
337 skeletal muscle (Ballak et al., 2014; Kuk et al., 2009). While age related changes in body  
338 composition in birds are poorly known, body mass changes likely partially reflect changes in  
339 energy reserves. We here suggest two possible options for the aging trajectories. First, we found  
340 that there is an increase with age in mass-adjusted standard metabolic rate (SMR), i.e. the  
341 minimum energy expenditure of a post-absorptive adult animal measured during the rest phase  
342 at temperatures below thermoneutrality (Briga, 2016). Such a larger energy turnover also  
343 requires larger energy reserves. Second, changes in body mass indicate an age associated change  
344 in the balance between the benefits and costs of carrying the weight in energy reserves. The  
345 lower mass in older birds indicates that these birds weighed the energetic costs of carrying extra  
346 mass more at the cost of starvation risk. This will likely make them more vulnerable to abiotic  
347 and biotic and challenges including harsh weather conditions and disease.

348

349 **Declarations of interest**

350 None.

351

352 **References**

- 353 Ballak, S.B., Degens, H., de Haan, A., Jaspers, R.T., 2014. Aging related changes in determinants of  
354 muscle force generating capacity: A comparison of muscle aging in men and male rodents.  
355 *Aging Res. Rev.* 14, 43–55. <https://doi.org/10.1016/j.arr.2014.01.005>
- 356 Bansal, A., Zhu, L.J., Yen, K., Tissenbaum, H.A., 2015. Uncoupling lifespan and healthspan in  
357 *Caenorhabditis elegans* longevity mutants. *Proc. Natl. Acad. Sci.* 112, E277–E286.  
358 <https://doi.org/10.1073/pnas.1412192112>
- 359 Barton, K., 2009. Package MuMIn: Model selection and model averaging based on information  
360 criteria. R package version 1.9.5. <http://r-forge.r-project.org/projects/mumin/>
- 361 Bates, D., Maechler, M., Bolker, B., Walker, S., 2015. Fitting linear mixed-effects models using  
362 lme4. *J. Stat. Softw.* 67, 1–48.
- 363 Bateson, P., Barker, D., Clutton-Brock, T., Deb, D., D’Udine, B., Foley, R.A., Gluckman, P., Godfrey,  
364 K., Kirkwood, T., Lahr, M.M., McNamara, J., Metcalfe, N.B., Monaghan, P., Spencer, H.G.,  
365 Sultan, S.E., 2004. Developmental plasticity and human health. *Nature* 430, 419–421.  
366 <https://doi.org/10.1038/nature02725>
- 367 Beirne, C., Delahay, R., Young, A., 2015. Sex differences in senescence: the role of intra-sexual  
368 competition in early adulthood. *Proc. R. Soc. B Biol. Sci.* 282, 20151086.  
369 <https://doi.org/10.1098/rspb.2015.1086>
- 370 Bonduriansky, R., Maklakov, A.A., Zajitschek, F., Brooks, R., 2008. Sexual selection , sexual conflict  
371 and the evolution of aging and life span. *Funct. Ecol.* 22, 443–453.  
372 <https://doi.org/10.1111/j.1365-2435.2008.01417.x>
- 373 Boonekamp, J.J., Mulder, G.A., Verhulst, S., 2018. Canalisation in the wild: effects of  
374 developmental conditions on physiological traits are inversely linked to their association  
375 with fitness. *Ecol. Lett.* In press. <https://doi.org/10.1002/mrd.22357>
- 376 Bouwhuis, S., Charmantier, A., Verhulst, S., Sheldon, B.C., 2010. Individual variation in rates of  
377 senescence: Natal origin effects and disposable soma in a wild bird population. *J. Anim.*  
378 *Ecol.* 79, 1251–1261. <https://doi.org/10.1111/j.1365-2656.2010.01730.x>
- 379 Briga, M., 2016. Growing up and growing old: A longitudinal study on aging in zebra finches.  
380 University of Groningen, Groningen, The Netherlands.
- 381 Briga, M., Koetsier, E., Boonekamp, J., Jimeno, B., Verhulst, S., 2017. Food availability affects adult  
382 survival trajectories depending on early developmental conditions. *Proc. R. Soc. B Biol. Sci.*  
383 284, 20162287.



- 384 Briga, M., Verhulst, S., 2015a. Large diurnal temperature range increases bird sensitivity to  
385 climate change. *Sci. Rep.* 5, 16600.
- 386 Briga, M., Verhulst, S., 2015b. What can long-lived mutants tell us about mechanisms causing  
387 aging and lifespan variation in natural environments? *Exp. Gerontol.* 71, 21-26.
- 388 Brodin, A., 2007. Theoretical models of adaptive energy management in small wintering birds.  
389 *Philos. Trans. R. Soc. Lond. B. Biol. Sci.* 362, 1857–1871.  
390 <https://doi.org/10.1098/rstb.2006.1812>
- 391 Burnham, K., Anderson, D., 2002. Model selection and multimodel inference: A practical  
392 information-theoretic approach, 2nd ed. Springer-Verlag, New York.  
393 <https://doi.org/10.1007/b97636>
- 394 Burnham, K.P., Anderson, D.R., Huyvaert, K.P., 2011. AIC model selection and multimodel  
395 inference in behavioral ecology: Some background, observations, and comparisons. *Behav.*  
396 *Ecol. Sociobiol.* 65, 23–35. <https://doi.org/10.1007/s00265-010-1029-6>
- 397 Catry, P., Phillips, R.A., Phalan, B., Croxall, J.P., 2006. Senescence effects in an extremely long-  
398 lived bird : the grey-headed albatross *Thalassarche chrysostoma* 1625–1630.  
399 <https://doi.org/10.1098/rspb.2006.3482>
- 400 Christensen, K., Doblhammer, G., Rau, R., Vaupel, J.W., 2009. Aging populations: the challenges  
401 ahead. *Lancet* 374, 1196–1208. [https://doi.org/10.1016/S0140-6736\(09\)61460-4](https://doi.org/10.1016/S0140-6736(09)61460-4)
- 402 Colman, R.J., Beasley, T.M., Allison, D.B., Weindruch, R., 2008. Attenuation of sarcopenia by  
403 dietary restriction in rhesus monkeys. *Journals Gerontol. Ser. A Biol. Sci. Med. Sci.* 63, 556–  
404 559. <https://doi.org/10.1093/gerona/63.6.556>
- 405 Coulson, J.C., Fairweather, J.A., 2001. Reduced reproductive performance prior to death in the  
406 Black-legged Kittiwake : senescence or terminal illness ? *J. Avian Biol.* 2, 146–152.
- 407 Cox, D., 1972. Regression models and life-tables. *J. R. Stat. Soc. Ser. B-Statistical Methodol.* 34,  
408 187–220.
- 409 de Kogel, C., 1997. Long-term effects of brood size manipulation on and sex-specific mortality of  
410 morphological development offspring. *J. Anim. Ecol.* 66, 167–178.
- 411 Douhard, F., Gaillard, J.M., Pellerin, M., Jacob, L., 2017. The cost of growing large: costs of post-  
412 weaning growth on body mass senescence in a wild mammal. *Oikos* 126, 1329–1338.  
413 <https://doi.org/10.1111/oik.04421>
- 414 Fischer, K.E., Gelfond, J.A.L., Soto, V.Y., Han, C., 2015. Health effects of long-term rapamycin  
415 treatment: the impact on mouse health of enteric rapamycin treatment from four months of



- 416 age throughout Life. PLoS One 10, e0126644.  
417 <https://doi.org/10.1371/journal.pone.0126644>
- 418 Gaillard, J.M., Lemaitre, J.-F., 2017. The Williams' legacy : A critical reappraisal of his nine  
419 predictions about the evolution of senescence. *Evolution* 71, 2768–2785.  
420 <https://doi.org/10.1111/evo.13379>
- 421 Gompertz, B., 1825. On the nature of the function expressive of the law of human mortality, and  
422 on a new mode of determining the value of life contingencies. *Philos. Trans. R. Soc.* 115,  
423 513–585. <https://doi.org/10.1098/rstb.2014.0379>
- 424 Griffith, S.C., Buchanan, K.L., 2010. Maternal effects in the zebra finch: a model mother reviewed.  
425 *Emu* 110, 251–267. <https://doi.org/10.1071/MU10006>
- 426 Hämäläinen, A., Dammhahn, M., Aujard, F., Eberle, M., Hardy, I., Peter, M., Perret, M., Schliehe-  
427 diecks, S., Kraus, C., B, P.R.S., Kappeler, P.M., 2014. Senescence or selective disappearance?  
428 Age trajectories of body mass in wild and captive populations of a small-bodied primate.  
429 *Proc. R. Soc. B Biol. Sci.* 281, 20140830. <https://doi.org/10.1098/rspb.2014.0830>
- 430 Hambly, C., Harper, E.J., Speakman, J.R., 2004. The energy cost of loaded flight is substantially  
431 lower than expected due to alterations in flight kinematics. *J. Exp. Biol.* 207, 3969–3976.  
432 <https://doi.org/10.1242/jeb.01234>
- 433 Hansen, M., Kennedy, B.K., 2016. Does longer lifespan mean longer healthspan? *Trends Cell Biol.*  
434 26, 565–568. <https://doi.org/10.1016/j.tcb.2016.05.002>
- 435 Hanson, M.A., Gluckman, P.D., 2014. Early developmental conditioning of later health and  
436 disease: physiology or pathophysiology? *Physiol. Rev.* 94, 1027–1076.  
437 <https://doi.org/10.1152/physrev.00029.2013>
- 438 Hayward, A.D., Moorad, J., Regan, C.E., Berenos, C., Pilkington, J.G., Pemberton, J.M., Nussey, D.H.,  
439 2015. Asynchrony of senescence among phenotypic traits in a wild mammal population.  
440 *Exp. Gerontol.* 71, 56–68. <https://doi.org/10.1016/j.exger.2015.08.003>
- 441 Herndon, L.A., Schmeissner, P.J., Dudaronek, J.M., Brown, P.A., Listner, K.M., Sakano, Y., Paupard,  
442 M.C., Hall, D.H., Driscoll, M., 2002. Stochastic and genetic factors influence tissue-specific  
443 decline in aging *C. elegans*. *Nature* 419, 808–814.
- 444 Jones, K.S., Nakagawa, S., Sheldon, B.C., 2009. Environmental sensitivity in relation to size and  
445 sex in birds: meta-regression analysis. *Am. Nat.* 174, 122–133.  
446 <https://doi.org/10.1086/599299>
- 447 Koetsier, E., Verhulst, S., 2011. A simple technique to manipulate foraging costs in seed-eating  
448 birds. *J. Exp. Biol.* 214, 1225–1229. <https://doi.org/10.1242/jeb.050336>

- 449 Kroeger, S.B., Blumstein, D.T., M, K.B.A.J., Martin, R.J.G.A., 2018. Age, state, environment, and  
450 season dependence of senescence in body mass. *Ecol. Evol.* 8, 2050–2061.  
451 <https://doi.org/10.1002/ece3.3787>
- 452 Kuk, J.L., Saunders, T.J., Davidson, L.E., Ross, R., 2009. Age-related changes in total and regional  
453 fat distribution. *Aging Res. Rev.* 8, 339–348. <https://doi.org/10.1016/j.arr.2009.06.001>
- 454 Kvist, A., Lindström A., Green, M., Piersma, T., Visser, G.H., 2001. Carrying large fuel loads during  
455 sustained bird flight is cheaper than expected. *Nature* 413, 730–732.  
456 <https://doi.org/10.1038/35099556>
- 457 Lemaitre, J.F., Gaillard, J.M., 2017. Reproductive senescence: new perspectives in the wild. *Biol.*  
458 *Rev.* 92, 2182–2199. <https://doi.org/10.1111/brv.12328>
- 459 Lindström, J., 1999. Early development and fitness in birds and mammals. *Trends Ecol. Evol.* 14,  
460 343–348. [https://doi.org/10.1016/S0169-5347\(99\)01639-0](https://doi.org/10.1016/S0169-5347(99)01639-0)
- 461 Lummaa, V., Clutton-Brock, T., 2002. Early development, survival and reproduction in humans.  
462 *Trends Ecol. Evol.* 17, 141–147. [https://doi.org/10.1016/s0169-5347\(01\)02414-4](https://doi.org/10.1016/s0169-5347(01)02414-4)
- 463 Maklakov, A.A., Lummaa, V., 2013. Evolution of sex differences in lifespan and aging: Causes and  
464 constraints. *BioEssays* 35, 717–724. <https://doi.org/10.1002/bies.201300021>
- 465 Martins, T.L.F., 2004. Sex-specific growth rates in zebra finch nestlings: A possible mechanism  
466 for sex ratio adjustment. *Behav. Ecol.* 15, 174–180.  
467 <https://doi.org/10.1093/beheco/arg094>
- 468 Metcalfe, N.B., Monaghan, P., 2001. Compensation for a bad start: Grow now, pay later? *Trends*  
469 *Ecol. Evol.* 16, 254–260. [https://doi.org/10.1016/S0169-5347\(01\)02124-3](https://doi.org/10.1016/S0169-5347(01)02124-3)
- 470 Miller, R.A., Harper, J.M., Galecki, A., Burke, D.T., 2002. Big mice die young: early life body weight  
471 predicts longevity in genetically heterogeneous mice. *Aging Cell* 1, 22–29.
- 472 Moe, B., Rønning, B., Verhulst, S., Bech, C., 2009. Metabolic aging in individual zebra finches. *Biol.*  
473 *Lett.* 5, 86–9. <https://doi.org/10.1098/rsbl.2008.0481>
- 474 Murtagh-Mark, C.M., Reiser, K.M., Harris, R., McDonald, R.B., 1995. Source of dietary  
475 carbohydrate affects life span of Fischer 344 rats independent of caloric restriction. *J.*  
476 *Gerontol. Ser. A Biol. Sci. Med. Sci.* 50, 148–154.
- 477 Nakagawa, S., Cuthill, I.C., 2007. Effect size, confidence interval and statistical significance: A  
478 practical guide for biologists. *Biol. Rev.* 82, 591–605. <https://doi.org/10.1111/j.1469-185X.2007.00027.x>
- 480 Neff, F., Flores-domínguez, D., Ryan, D.P., Horsch, M., Schröder, S., Adler, T., Afonso, L.C., Aguilar-

- 481 pimentel, J.A., Becker, L., Garrett, L., Hans, W., Hettich, M.M., Holtmeier, R., Hölter, S.M.,  
482 Moreth, K., Prehn, C., Puk, O., Rácz, I., Rathkolb, B., Rozman, J., Naton, B., Ordemann, R.,  
483 Adamski, J., Beckers, J., Bekeredjian, R., 2013. Rapamycin extends murine lifespan but has  
484 limited effects on aging. *J. Clin. Invest.* 123, 3272–3291.  
485 <https://doi.org/10.1172/JCI67674DS1>
- 486 Nussey, D.H., Coulson, T., Delorme, D., Clutton-Brock, T.H., Pemberton, J.M., Festa-Bianchet, M.,  
487 Gaillard, J.M., 2011. Patterns of body mass senescence and selective disappearance differ  
488 among three species of free-living ungulates. *Ecology* 92, 1936–1947.  
489 <https://doi.org/10.1890/11-0308.1>
- 490 Nussey, D.H., Froy, H., Lemaitre, J.F., Gaillard, J.M., Austad, S.N., 2013. Senescence in natural  
491 populations of animals: Widespread evidence and its implications for bio-gerontology.  
492 *Aging Res. Rev.* 12, 214–225. <https://doi.org/10.1016/j.arr.2012.07.004>
- 493 Nussey, D.H., Kruuk, L.E.B., Morris, A., Clutton-Brock, T.H., 2007. Environmental conditions in  
494 early life influence aging rates in a wild population of red deer. *Curr. Biol.* 17, 1000–1001.  
495 <https://doi.org/10.1016/j.cub.2007.10.005>
- 496 Prospective Studies Collaboration, 2009. Body-mass index and cause-specific mortality in 900  
497 000 adults: collaborative analyses of 57 prospective studies. *Lancet* 373, 1083–1096.  
498 [https://doi.org/10.1016/S0140-6736\(09\)60318-4](https://doi.org/10.1016/S0140-6736(09)60318-4)
- 499 R Core Team, 2017. R: A language and environment for statistical computing. R Foundation for  
500 Statistical Computing, Vienna, Austria. <https://www.R-project.org/>
- 501 Rattiste, K., 2004. Reproductive success in presenescent common gulls (i): the importance of the  
502 last year of life. *Proc. R. Soc. B Biol. Sci.* 271, 2059–2064.  
503 <https://doi.org/10.1098/rspb.2004.2832>
- 504 Salomons, H.M., Mulder, G.A., Zande, L. Van De, Hausmann, M.F., Linskens, M.H.K., Verhulst, S.,  
505 2009. Telomere shortening and survival in free-living corvids. *Proc. R. Soc. B Biol. Sci.*  
506 3157–3165. <https://doi.org/10.1098/rspb.2009.0517>
- 507 Sayer, A.A., Syddall, H., Martin, H., Patel, H., Baylis, D., Cooper, C., 2008. The developmental  
508 origins of sarcopenia. *J. Nutr. Heal. Aging* 12, 427–432.
- 509 Schielzeth, H., Forstmeier, W., 2009. Conclusions beyond support: overconfident estimates in  
510 mixed models. *Behav. Ecol.* 20, 416–420. <https://doi.org/10.1093/beheco/arn145>
- 511 Schmidt-Wellenburg, C.A., Engel, S., Visser, G.H., 2008. Energy expenditure during flight in  
512 relation to body mass: Effects of natural increases in mass and artificial load in Rose  
513 Coloured Starlings. *J. Comp. Physiol. B Biochem. Syst. Environ. Physiol.* 178, 767–777.

- 514 <https://doi.org/10.1007/s00360-008-0267-7>
- 515 Simons, M.J.P., Briga, M., Verhulst, S., 2016. Stabilizing survival selection on presenescent  
516 expression of a sexual ornament followed by a terminal decline. *J. Evol. Biol.* 29, 1368–  
517 1378. <https://doi.org/10.1111/jeb.12877>
- 518 Tafani, M., Cohas, A., Bonenfant, C., Gaillard, J.M., Lardy, S., Allainé, D., 2013. Sex-specific  
519 senescence in body mass of a monogamous and monomorphic mammal: the case of Alpine  
520 marmots. *Oecologia* 172, 427–436. <https://doi.org/10.1007/s00442-012-2499-1>
- 521 Torres, R., Drummond, H., Velando, A., 2011. Parental age and lifespan influence offspring  
522 recruitment: A long-term study in a seabird. *PLoS One* 6.  
523 <https://doi.org/10.1371/journal.pone.0027245>
- 524 Turturro, A., Witt, W.W., Lewis, S., Hass, B.S., Lipman, R.D., Hart, R.W., 1999. Growth curves and  
525 survival characteristics of the animals used in the Biomarkers of Aging Program. *J. Gerontol.*  
526 *A. Biol. Sci. Med. Sci.* 54, B492–B501. <https://doi.org/10.1093/gerona/54.11.B492>
- 527 van de Pol, M., 2012. Quantifying individual variation in reaction norms: how study design  
528 affects the accuracy, precision and power of random regression models. *Methods Ecol. Evol.*  
529 3, 268–280. <https://doi.org/10.1111/j.2041-210X.2011.00160.x>
- 530 van de Pol, M., Verhulst, S., 2006. Age-dependent traits: a new statistical model to separate  
531 within- and between-individual effects. *Am. Nat.* 167, 766–73.  
532 <https://doi.org/10.1086/503331>
- 533 van de Pol, M., Wright, J., 2009. A simple method for distinguishing within- versus between-  
534 subject effects using mixed models. *Anim. Behav.* 77, 753–758.  
535 <https://doi.org/10.1016/j.anbehav.2008.11.006>
- 536 Verhulst, S., Geerdink, M., Salomons, H.M., Boonekamp, J.J., 2014. Social life histories: jackdaw  
537 dominance increases with age, terminally declines and shortens lifespan. *Proc. R. Soc. B*  
538 *Biol. Sci.* 281, 20141045.
- 539 Wiersma, P., Verhulst, S., 2005. Effects of intake rate on energy expenditure, somatic repair and  
540 reproduction of zebra finches. *J. Exp. Biol.* 208, 4091–4098.  
541 <https://doi.org/10.1242/jeb.01854>
- 542 Williams, G.C., 1999. The tithonus error in modern gerontology. *Q. Rev. Biol.* 74, 405–415.
- 543 Yu, B.P., Masoro, E.J., McMahan, C.A., 1985. Nutritional influences on aging of Fischer 344 rats: I.  
544 physical, metabolic, and longevity characteristics. *J. Gerontol.* 40, 671–688.
- 545 Zann, R.A., 1996. *The Zebra Finch: a synthesis of field and laboratory studies.* Oxford University

546 Press, Oxford.

547 Table 1: Median lifespan and description of the changes with age and onset of body mass aging  
 548 per experimental group and per sex. Median lifespan values are taken from (Briga et al., 2017)

| <b>Developmental environment</b> | <b>Benign</b> |              | <b>Harsh</b>   |                 |
|----------------------------------|---------------|--------------|----------------|-----------------|
| <b>Adult environment</b>         | <b>Benign</b> | <b>Harsh</b> | <b>Benign</b>  | <b>Harsh</b>    |
| <b>Males</b>                     |               |              |                |                 |
| N                                | 75            | 75           | 73             | 81              |
| median lifespan [years]          | 4.3           | 4.0          | 3.6            | 3.6             |
| aging trajectory                 | quadratic     | quadratic    | quadratic      | quadratic       |
| onset of decline [years]         | 8.2           | 3.7          | 3.4            | 3.9             |
| <b>Females</b>                   |               |              |                |                 |
| N                                | 68            | 75           | 73             | 77              |
| median lifespan [years]          | 3.7           | 4.0          | 3.5            | 2.7             |
| aging trajectory                 | quadratic     | quadratic    | linear decline | linear increase |
| onset of decline [years]         | 2.7           | 3.3          | 0.3            | no decline      |

549

550

551 Fig. 1: Schematic representation of four aging shapes tested in this manuscript, i.e. starting from  
552 the age at which traits decline in performance. Aging may be determined by chronological age,  
553 following gradual (A) or accelerating decline (B). Alternatively, aging may be better described by  
554 years before death resulting in a terminal decline (C) or by a combination of a chronological and  
555 terminal decline (D).

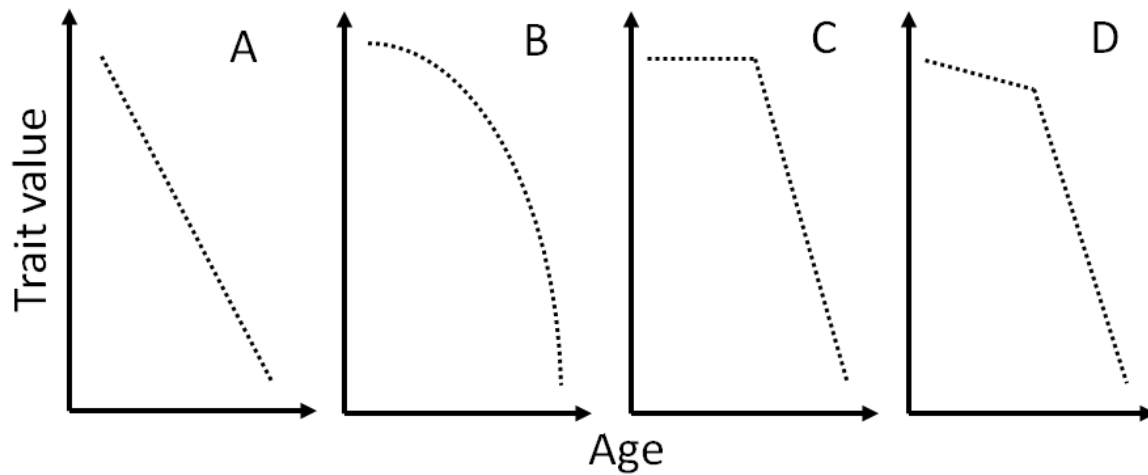

556

557

558 Fig. 2: Harsh environments decreased mass. Shown are boxplots with median, quartiles and 95%  
559 CI. Statistical analysis showed the effects of developmental and adult environments to be  
560 additive for mass. Horizontal lines connect groups from different brood sizes in the same  
561 foraging treatment.

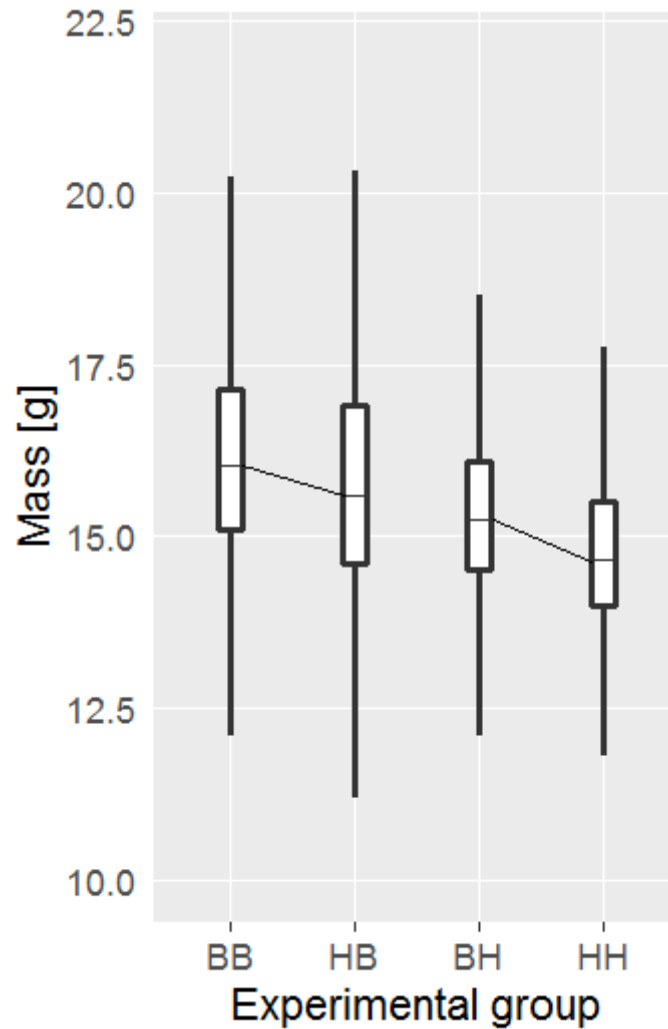

562



563 Fig. 3: Within-individual mass age trajectories are sex and environment specific. Males show a  
564 quadratic age trajectory which shape was consistent across experimental groups (A-D). In  
565 contrast, (A & B) females showed a quadratic age trajectory when foraging costs were low but (C  
566 & D) when foraging costs were high the age trajectory was linearly which slope depended on  
567 developmental conditions: increasing and decreasing for birds from benign vs. harsh  
568 developmental conditions respectively. For data plots, see fig. S4.

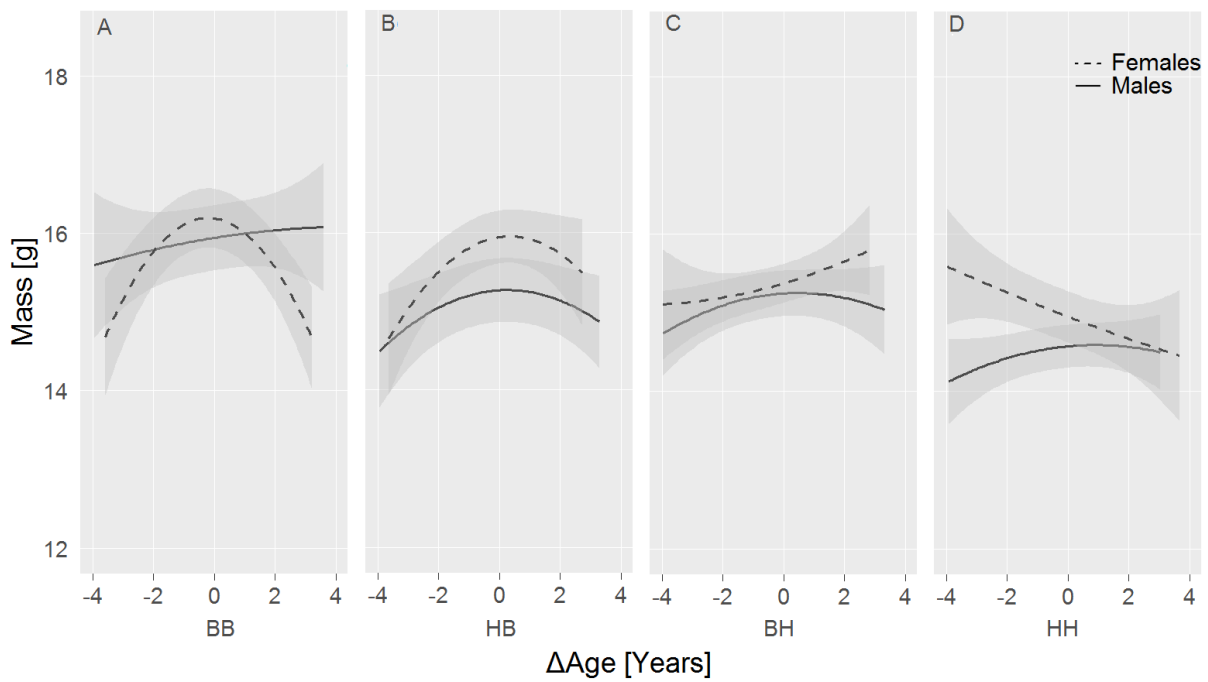

569

570 Fig. 4 Within-individual aging trajectories for mass are independent of lifespan variation within  
571 experimental groups. For graphical purposes, age trajectories are shown for individuals living  
572 longer and shorter than median lifespan per experimental group. Analyses were done with  
573 lifespan as a continuous variable.

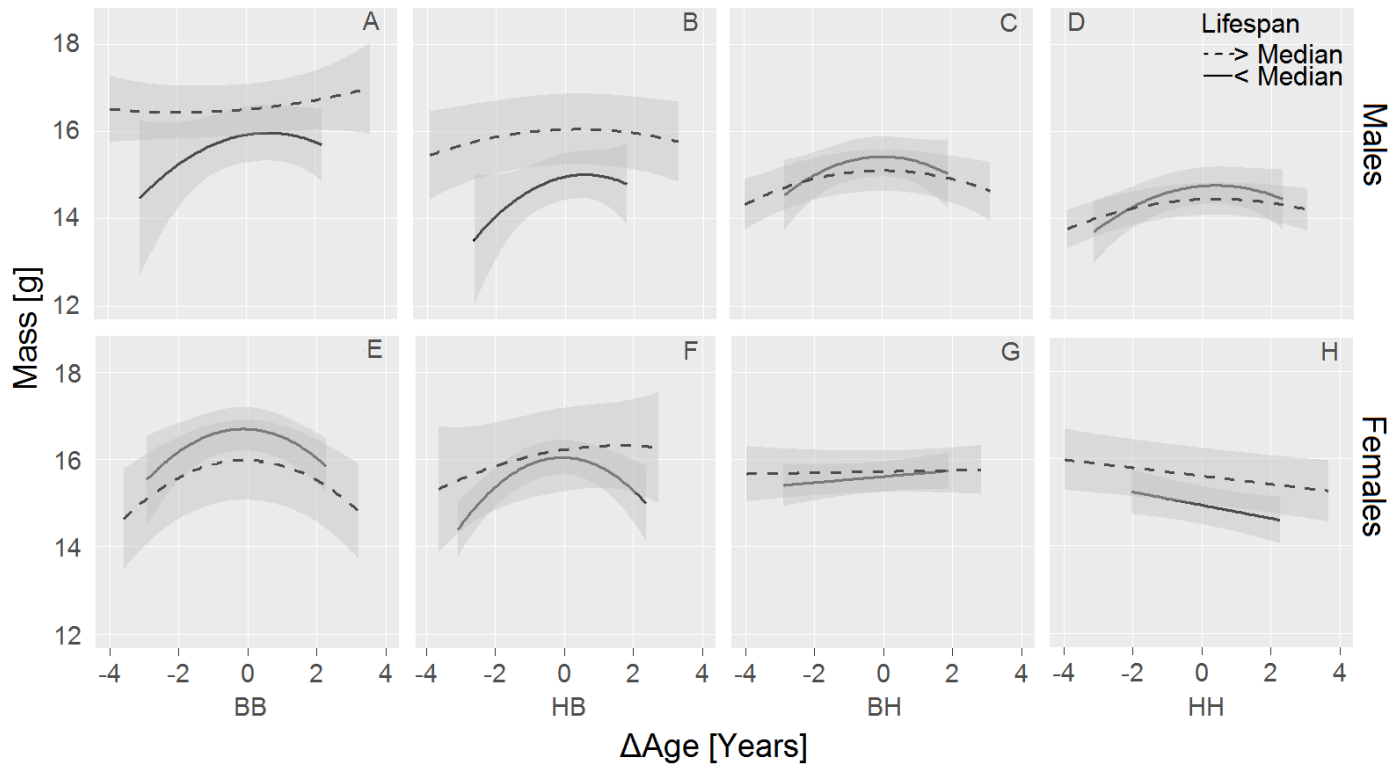

574
